# Supplementary material
Source: PubMed Central journal article supplement (PMC7499402)
Supplement: NIHMS1605032-supplement-1.pdf [file NIHMS1605032-supplement-1.pdf]

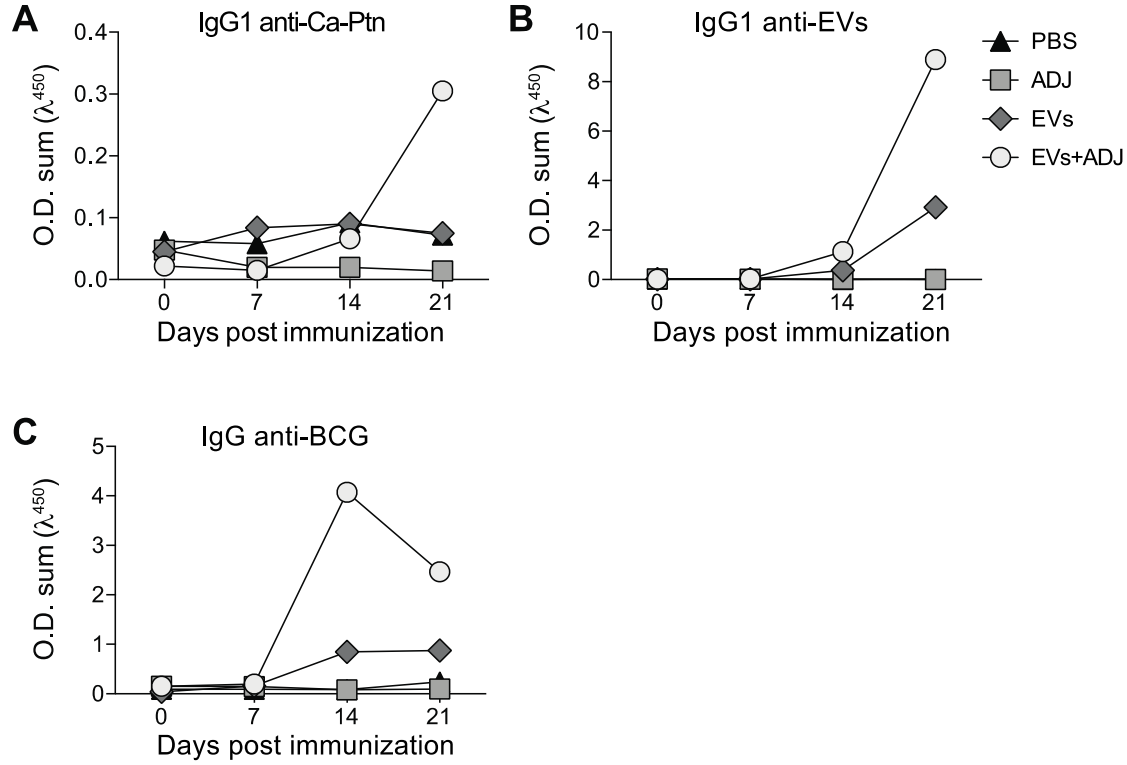

**Supplemental Figure 1- Fungal IgG1 and BCG-specific IgG levels.** Mice were vaccinated intraperitoneally with EVs from *C. albicans* with (EVs+ADJ) or without (EVs) complete Freund's adjuvant (ADJ) four times as described in Figure 1. (A and B) IgG1 anti Ca-Ptn and anti-EVs were determined. Total IgG anti-BCG was also measured. These data represent one of two independent experiments with consistent findings.

|        | Groups    |     |         |           |           |           |
|--------|-----------|-----|---------|-----------|-----------|-----------|
| Groups |           | PBS | EVs 4°C | EVs -20°C | EVs -80°C | Fresh EVs |
|        | PBS       |     | 0.022   | 0.021     | 0.0045    | 0.0002    |
|        | EVs 4°C   |     |         | 0.93      | 0.69      | 0.12      |
|        | EVs -20°C |     |         |           | 0.67      | 0.11      |
|        | EVs -80°C |     |         |           |           | 0.18      |
|        | Fresh EVs |     |         |           |           |           |

**Supplemental Table 1** – P-values calculated for the experiment showed in Figure 8 (Pretreatment with fungal EVs reduced the mortality of *G. mellonella* larvae infected with *C. albicans*).
